# Supplementary material for: Design, Synthesis, Structural, and Computational Studies of (Z)-2,2′,4,4′,5,5′-Hexahydroxy Stilbene as a Potential Antifungal Agent
Source: Research Square preprint supplement (doi:10.21203/rs.3.rs-6755724/v1), 2025-06-17
Supplement: Supplementary file 1 [file 854a12ecec6cdbb011f17270.docx]

Supplementary Data Information

**Design, Synthesis, Structural, and Computational Studies of (Z)-2,2′,4,4′,5,5′-Hexahydroxy Stilbene as a Potential Antifungal Agent**

Gopal Krishna Murthy H.R.* a, Revanasiddappa H.D. a, Shivaprakash. S b, Vennila Kailasam Natesan c, Mohammed Saleh Al Ansari d, Suhail Ahmad* e

a Department of Studies in Chemistry, University of Mysore, Mysuru-570005, Karnataka, India.

b Former Scientist in Vittal Mallya Scientific Research Foundation, Bangalore, India.

c Dept of Physics, PSNA College of Engineering and Technology, Dindigul, Tamil Nadu, India .

dDepartment of Chemical Engineering, College of Engineering, University of Bahrain, Sakhir, Bahrain

e Department of Chemistry, School of Sciences, Maulana Azad National Urdu University, Hyderabad, 500032, Telangana, India.

*Corresponding Author: [suhailalig5187@gmail.com](mailto:suhailalig5187@gmail.com)

**Graphical Abstract**


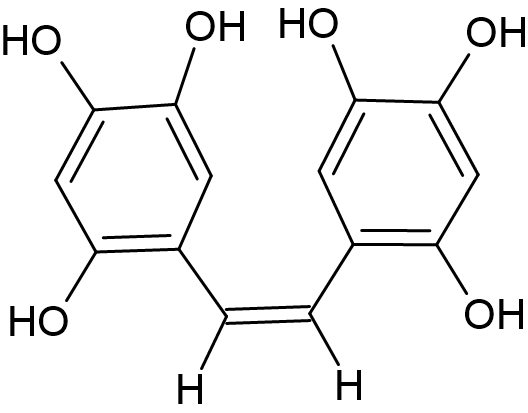


**Figure 1**: *(Z)*-2, 2', 4, 4', 5, 5'- Hexahydroxy stilbene


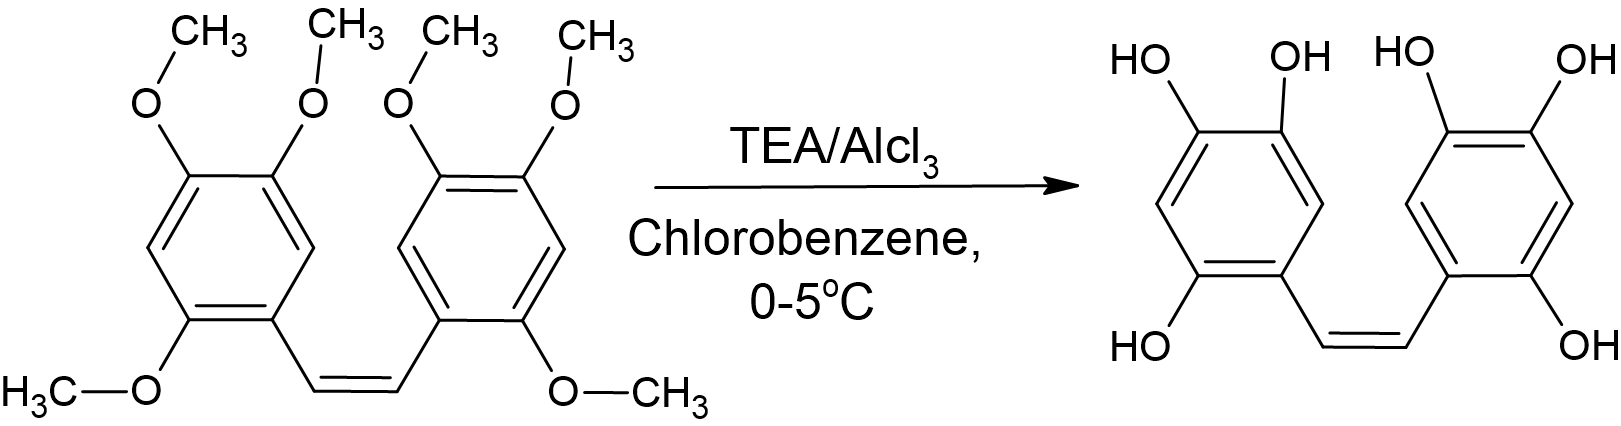


**Figure 2:** Synthesis of (Z)-2, 2', 4, 4', 5, 5'-Hexahydroxy stilbene


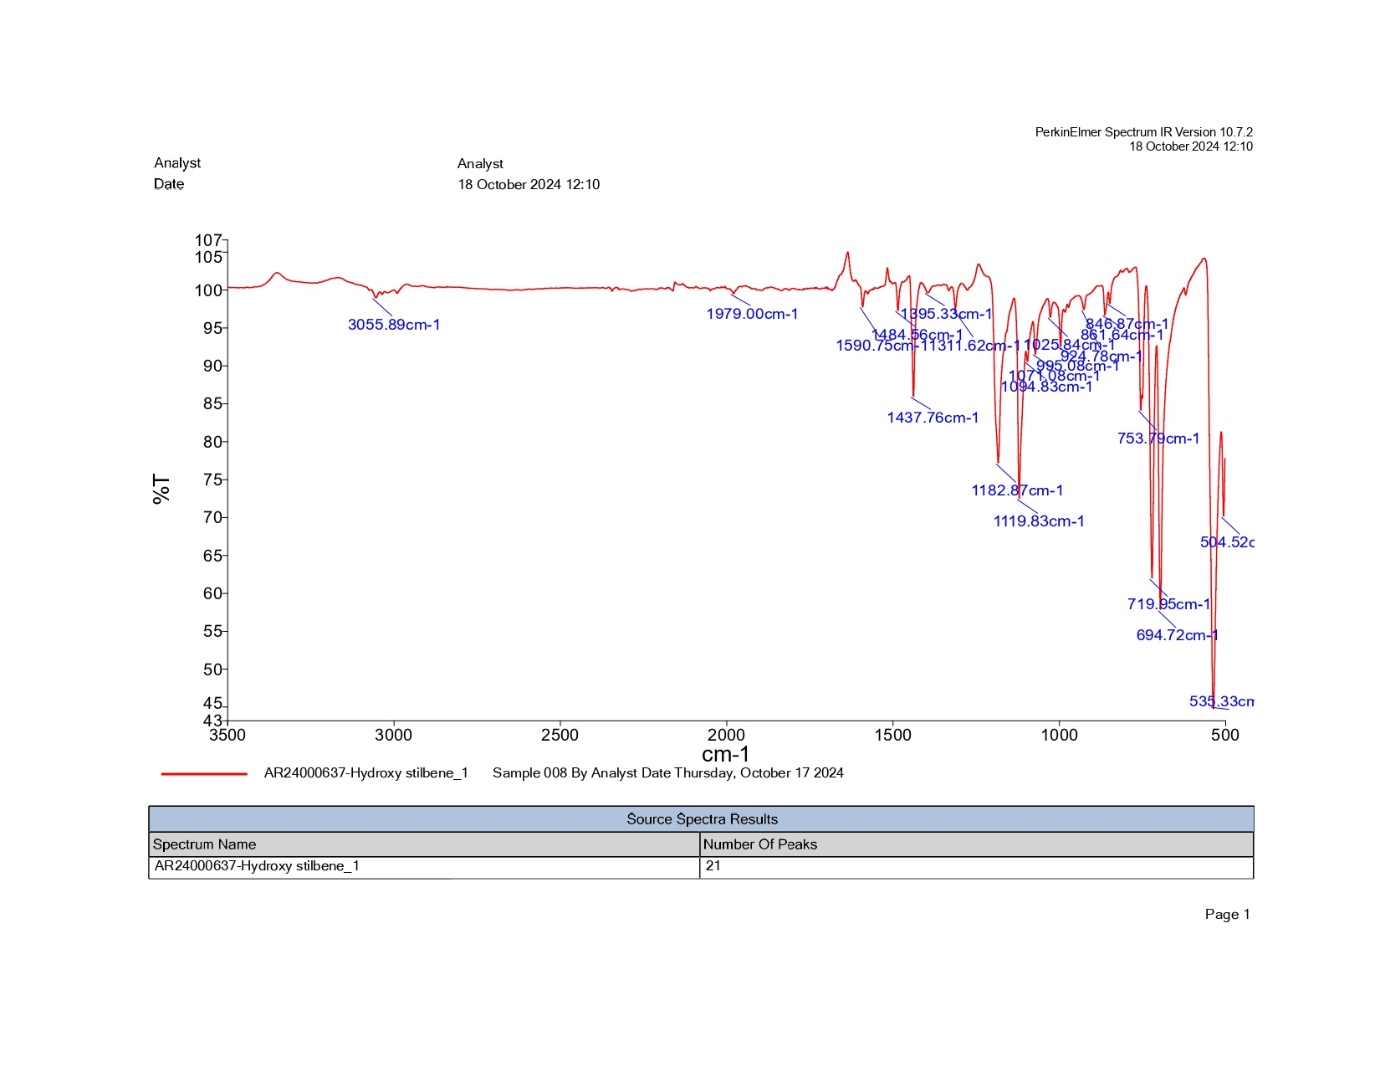


**Figure 3**: FTIR analysis of (Z) - 2, 2', 4, 4', 5, 5'-Hexahydroxy stilbene


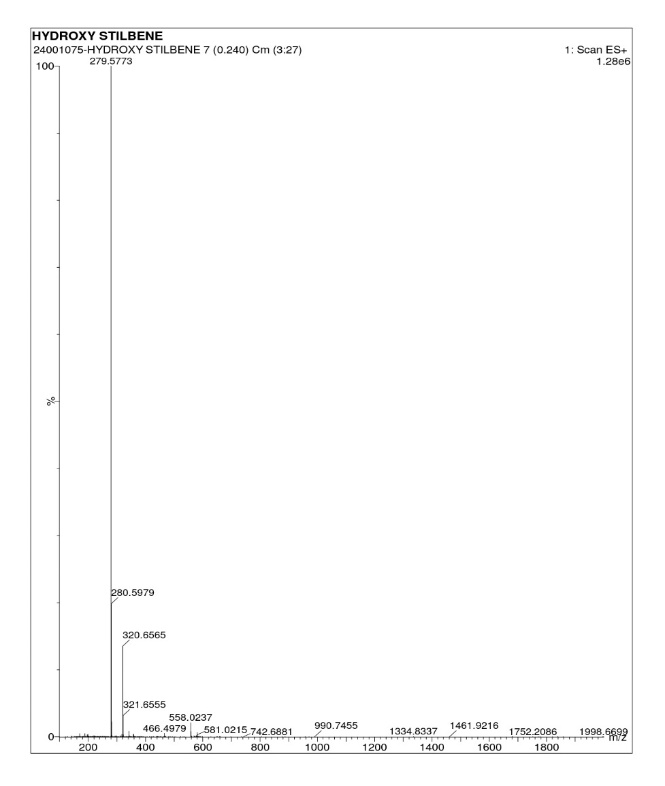

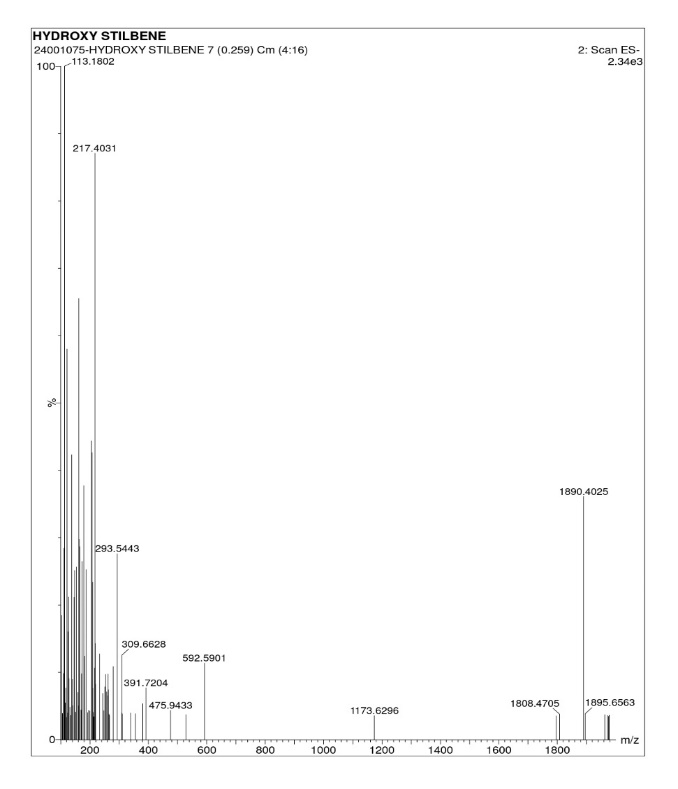


**Figure 4:** Mass spectrometry analysis of 2, 2', 4, 4', 5, 5'-Hexahydroxy stilbene


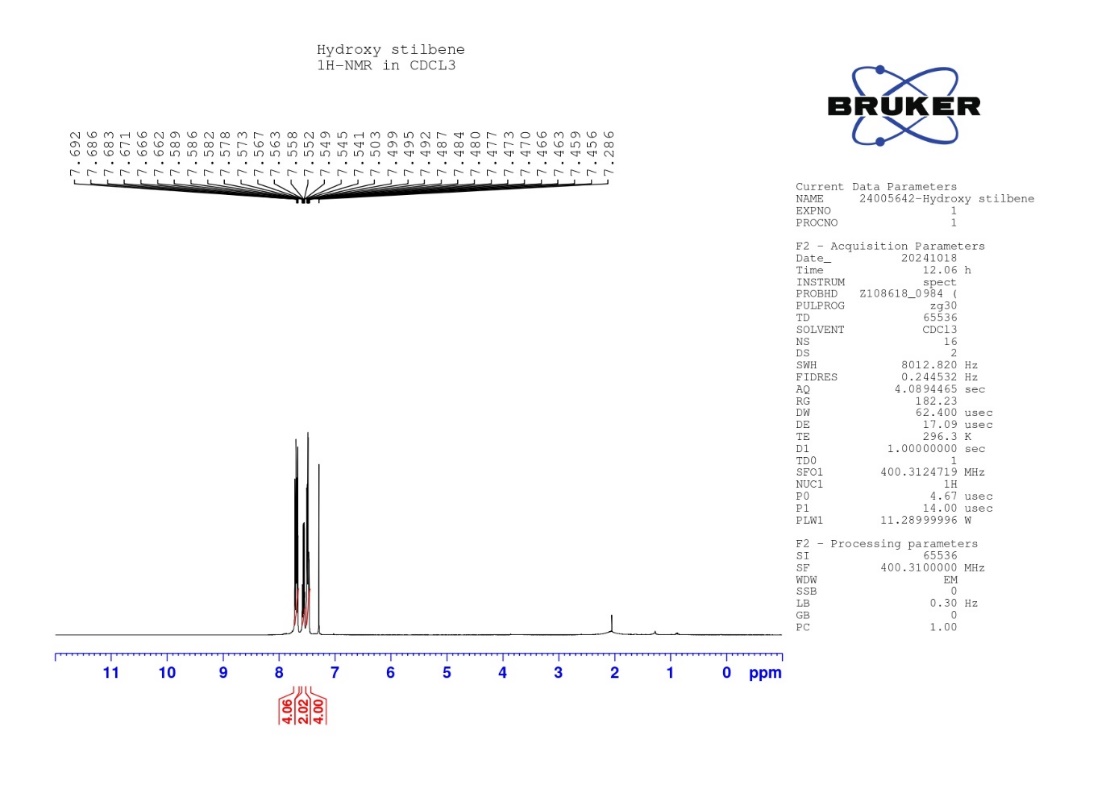


**Figure 5**: 1H-NMR analysis of 2, 2', 4, 4', 5, 5'-Hexahydroxy stilbene


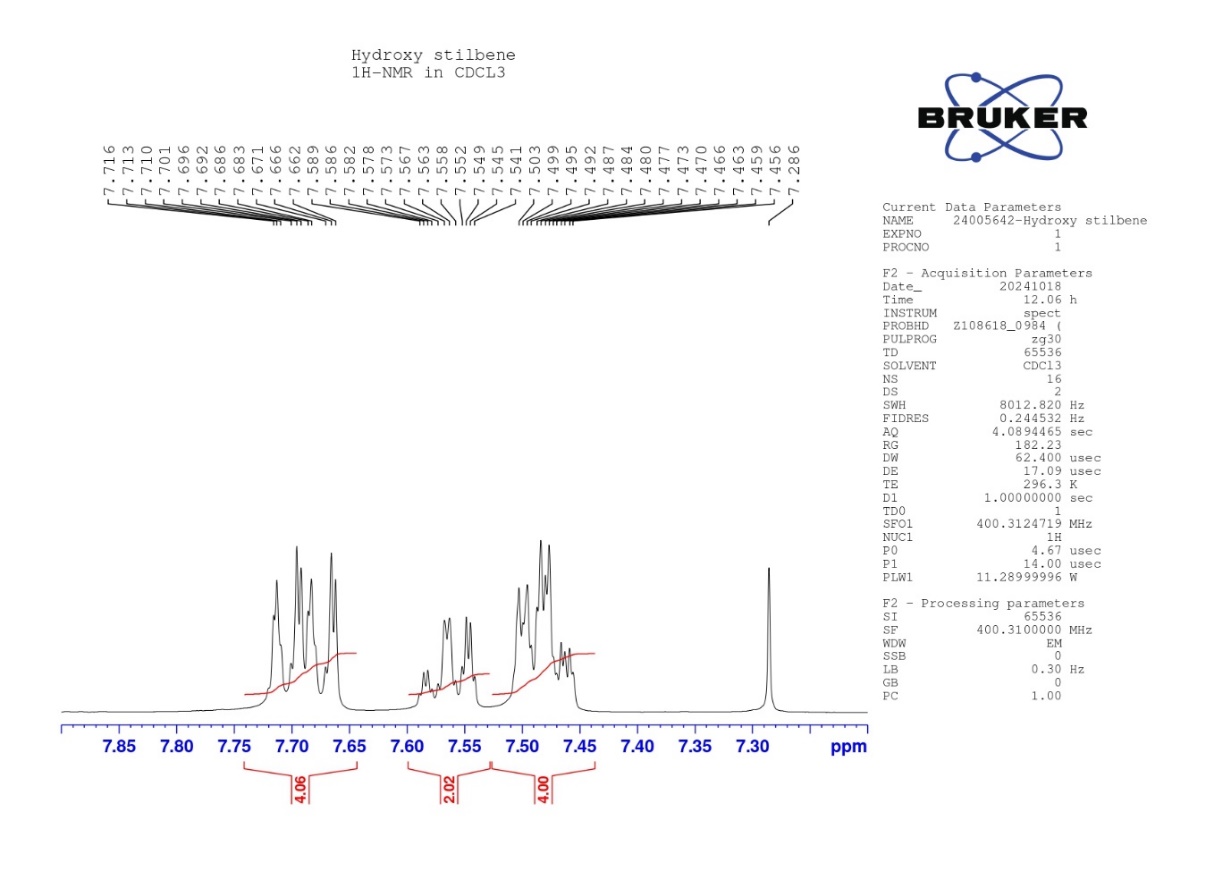


**Figure 6**: 1H-NMR analysis of 2, 2', 4, 4', 5, 5'-Hexahydroxy stilbene


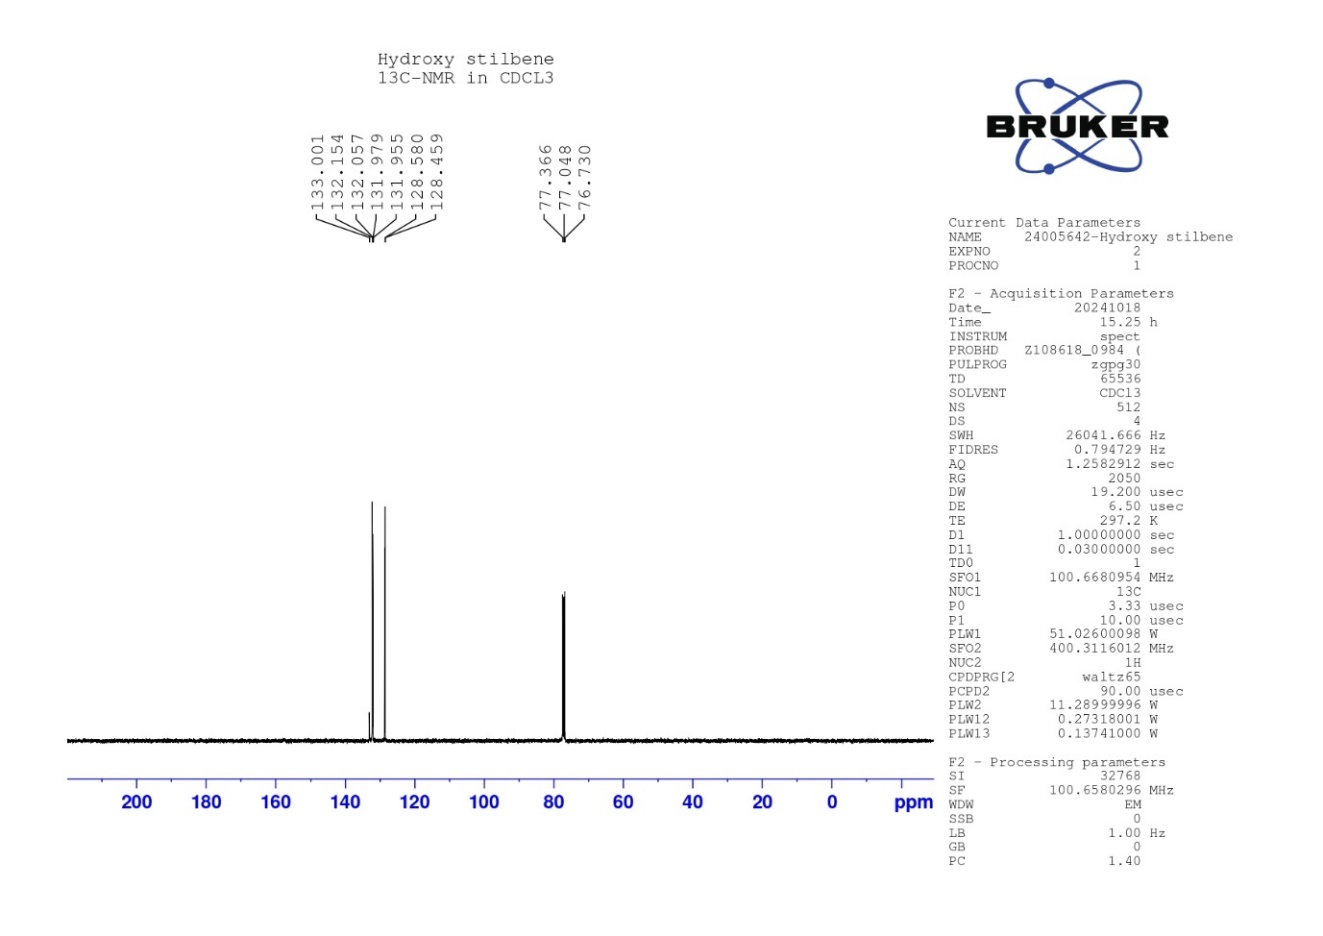


**Figure 7**: 13C-NMR analysis of 2, 2', 4, 4', 5, 5'-Hexahydroxy stilbene


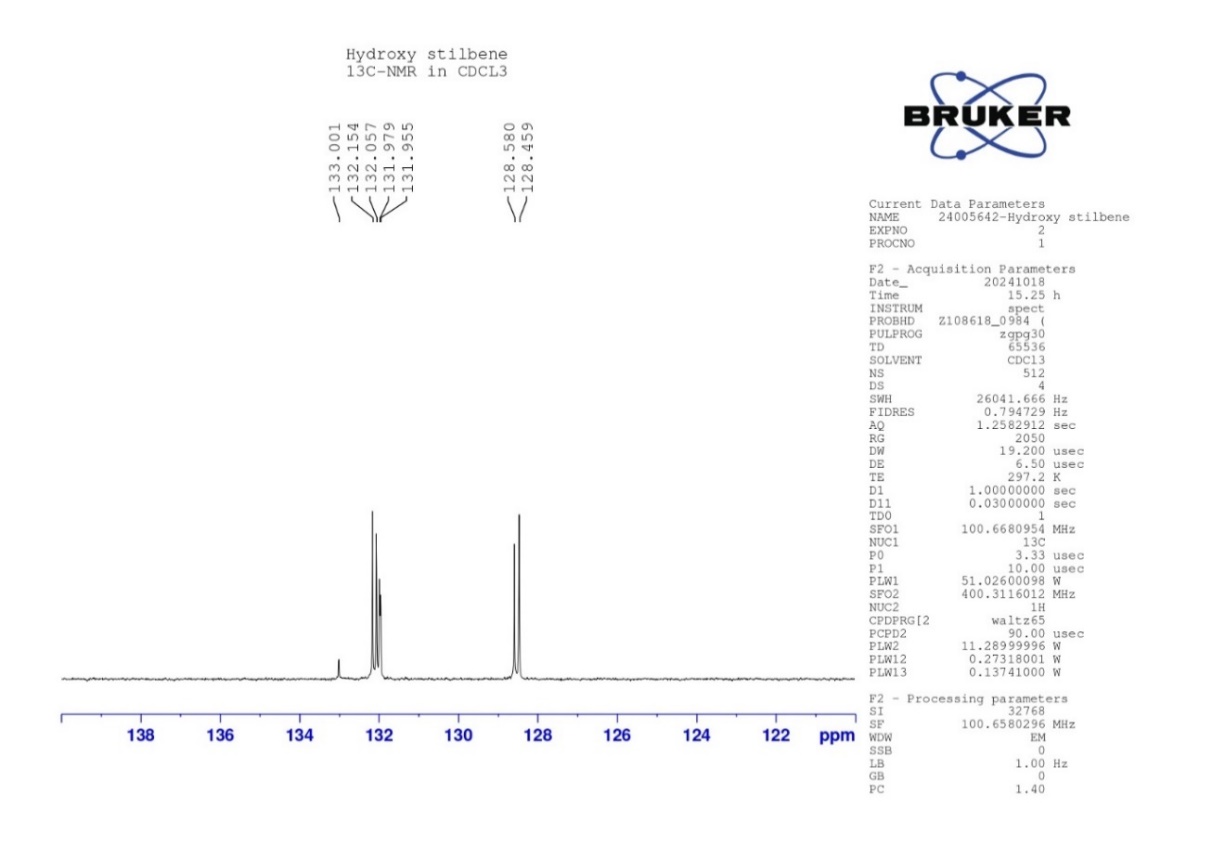


**Figure 8**: 13C-NMR analysis of 2, 2', 4, 4', 5, 5'-Hexahydroxy stilbene

**Figure 9**: XRD analysis of 2, 2', 4, 4', 5, 5'-Hexahydroxy stilbene

**Table 1**: Ramachandran plot favourable regions of proteins.

| **S.N.** | **-Protein Structure** | **Number of Residues in Favoured Regions (%)** | **Number of Residues in Allowed Regions (%)** | **Number of Residues in Disallowed Regions (%)** |
| --- | --- | --- | --- | --- |
| 1 | ***Candida albicans* (PDB ID:4HOE)** | | 93.3% | | --- |  |  | | --- | | | 6.7% | | --- |  |  | | --- | | 0.0% |


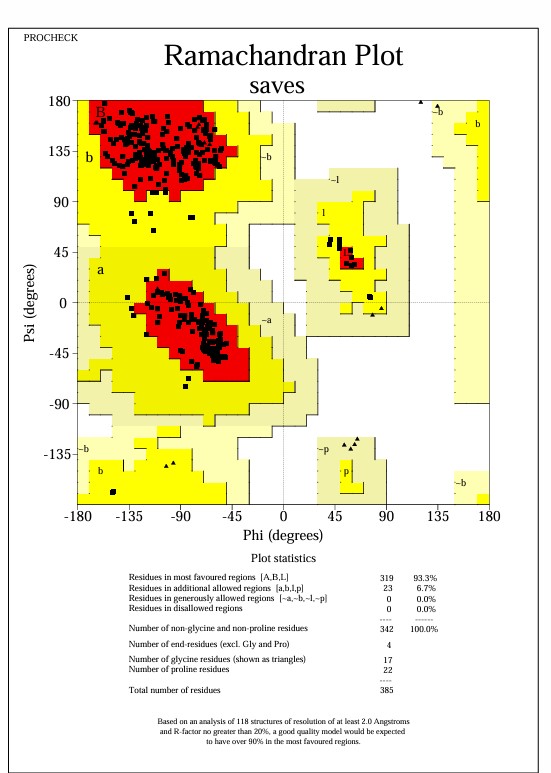


**Figure 10: The Ramachandran plot generated from RAMPAGE. The Ramachandran plot representing energetically allowable regions for backbone dihedral angles ψ vs φ amino acid residues in selected protein structure (A) The structure *Candida albicans* (PDB ID:4HOE)**

**
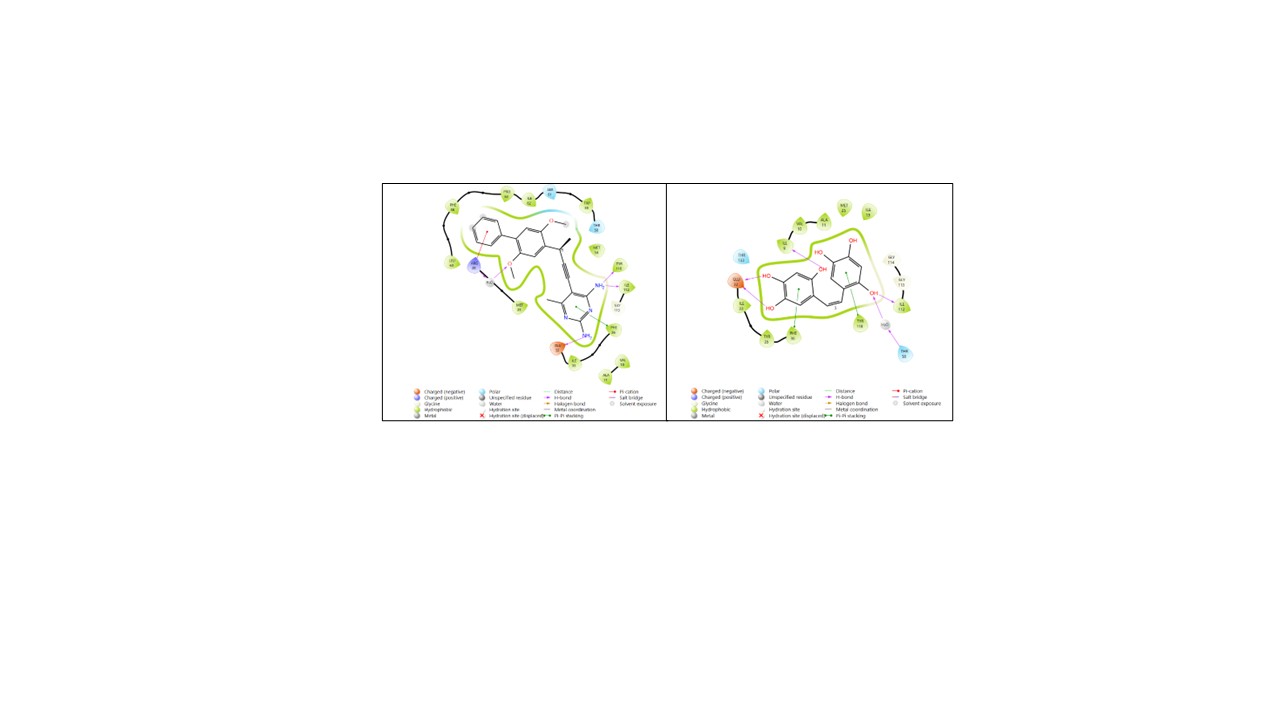
**

**(A) (B)**

**Figure 11: 2-dimensional visualisation of molecular docking of Candida albicans (PDB ID: 4HOE)** highlighting hydrogen bonds, hydrophobic interactions where (A) and (B) The molecular docking interactions of hydroxy stilbene with the fungal protein (PDB ID: 4HOE)


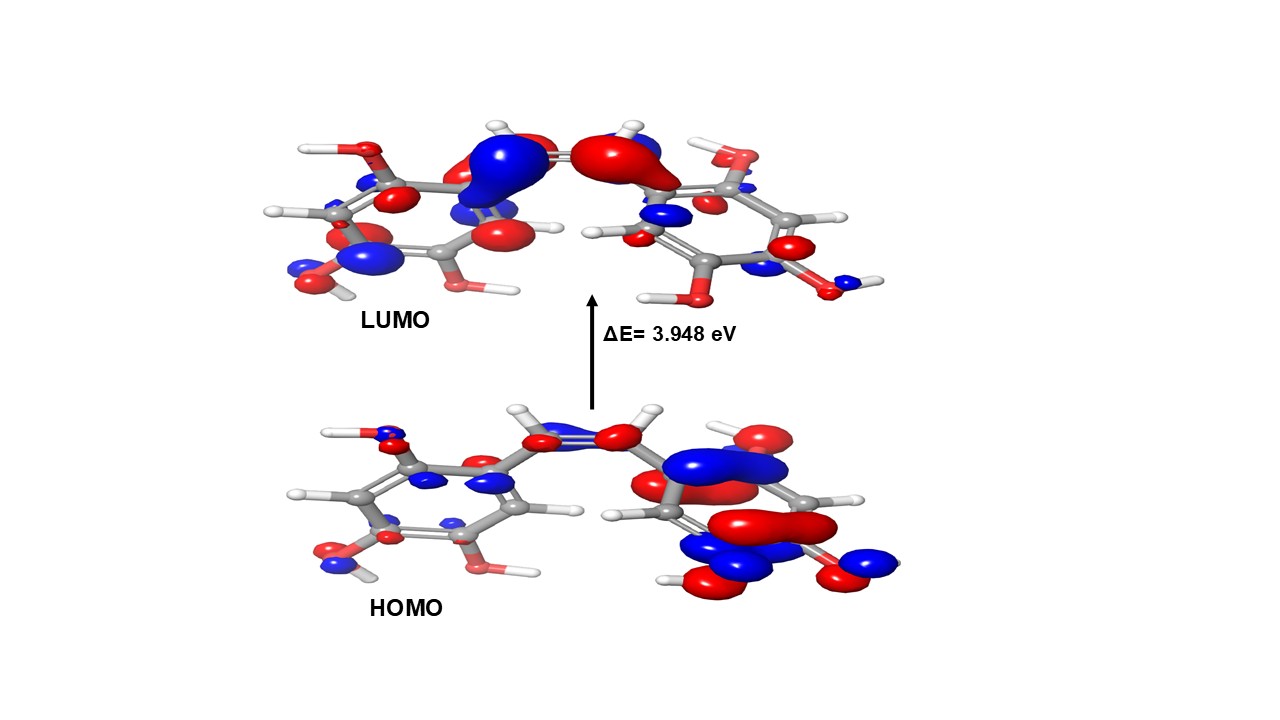


**Figure 12 & Table 2:** HOMO-LUMO Surface Structures energy gap (ΔE = 3.948 eV) of the stilbene derivative, highlighting its electronic stability and potential reactivity.


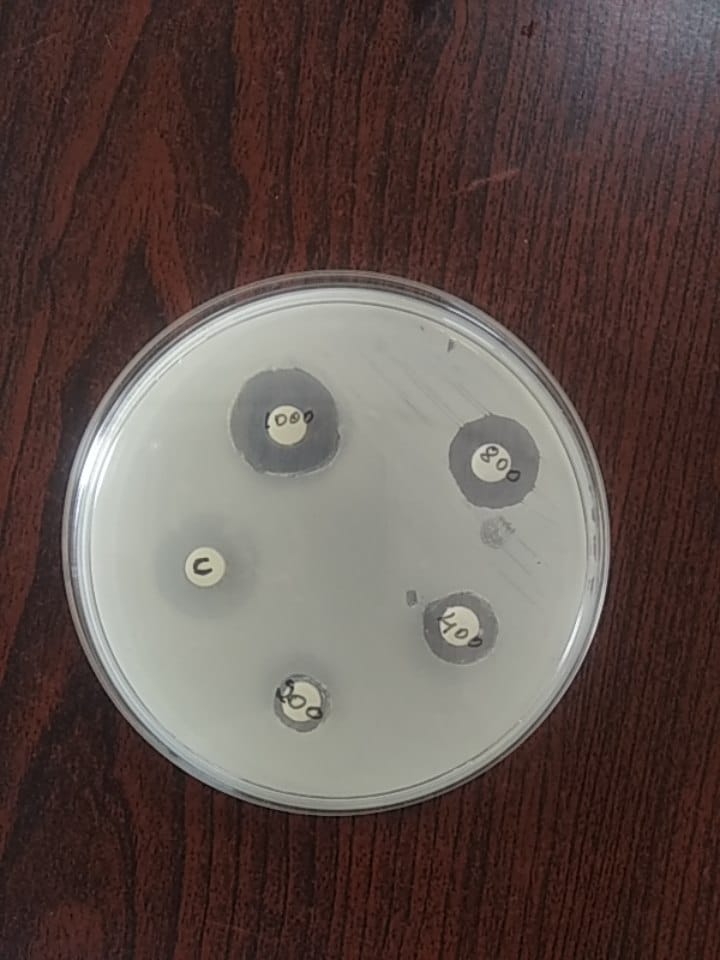


**Figure 13:** The inhibition of *Candida albicans* treated with 2, 2', 4, 4', 5, 5'-Hexahydroxystilbene at varying concentrations (200, 400, 800, 1000 µg/ml) and Itraconazole (10 µg/ml) as a positive control.

**Table 3**: Minimum inhibition concentration values

| **Compound** | **Concentration** | ***Candida albicans*** |
| --- | --- | --- |
| 2, 2', 4, 4', 5, 5'-Hexahydroxystilbene | 200 µg/ml | 0.8 mm |
| 400 µg/ml | 2.4 mm |
| 800 µg/ml | 15.1mm |
| 1000 µg/ml | 18.2 mm |
| Itraconazole | 10 µg/ml | 16.1mm |
